# Supplementary material for: ANKRD24 organizes TRIOBP to reinforce stereocilia insertion points
Source: PubMed Central journal article supplement (PMC8859912; doi:10.1083/jcb.202109134), 2022-02-17

Fig 2M

+ + - - ANKRD24-GFP  
 - - + + TRIOBP-4-GFP  
 - + - + HA-ANKRD24

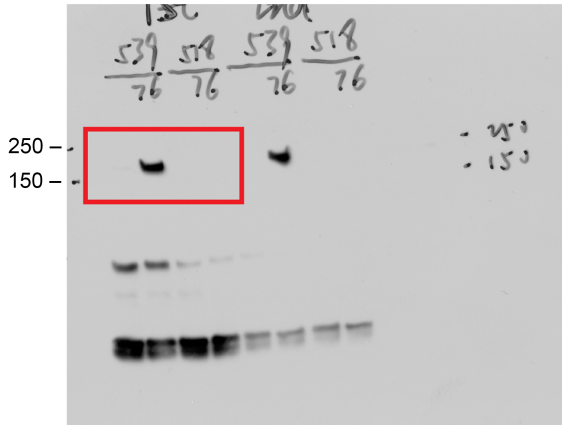

539: ankrd24-GFP  
 518: GFP-triobp isoform 4  
 76: HA-Ankrd24

+ + - - ANKRD24-GFP  
 - - + + TRIOBP-4-GFP  
 - + - + HA-ANKRD24

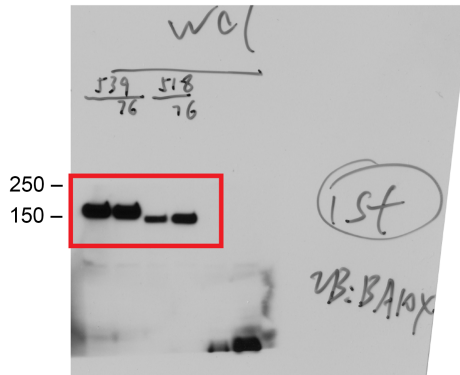

K

+ + - - ANKRD24-GFP  
 - - + + TRIOBP-4-GFP  
 - + - + HA-ANKRD24

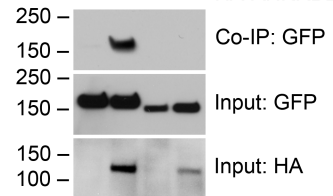

+ + - - ANKRD24-GFP  
 - - + + TRIOBP-4-GFP  
 - + - + HA-ANKRD24

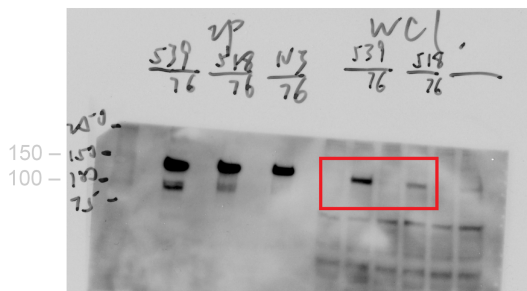

Supplement: JCB_202109134_SourceDataF2.pdf [file JCB_202109134_SourceDataF2.pdf]
