# Supplementary material for: ANKRD24 organizes TRIOBP to reinforce stereocilia insertion points
Source: PubMed Central journal article supplement (PMC8859912; doi:10.1083/jcb.202109134), 2022-02-17
Supplement: JCB_202109134_SourceDataF3.pdf [file JCB_202109134_SourceDataF3.pdf]

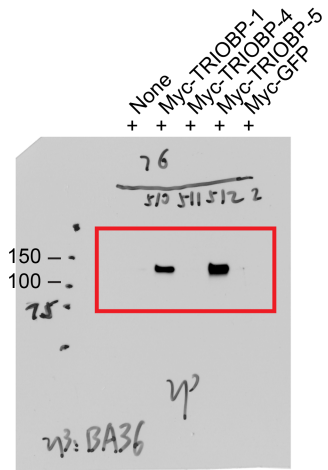

Fig 3B

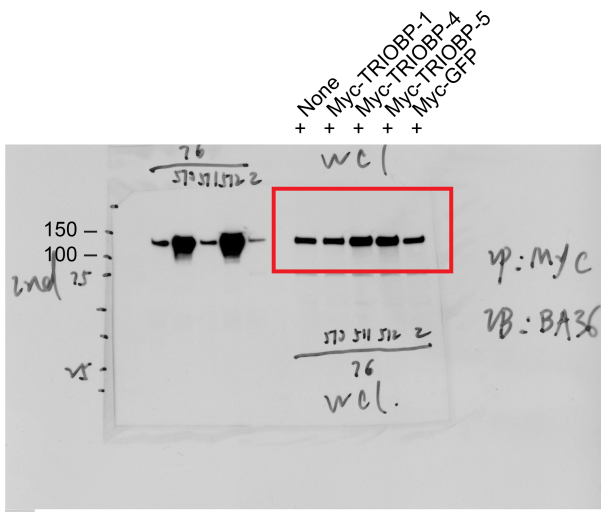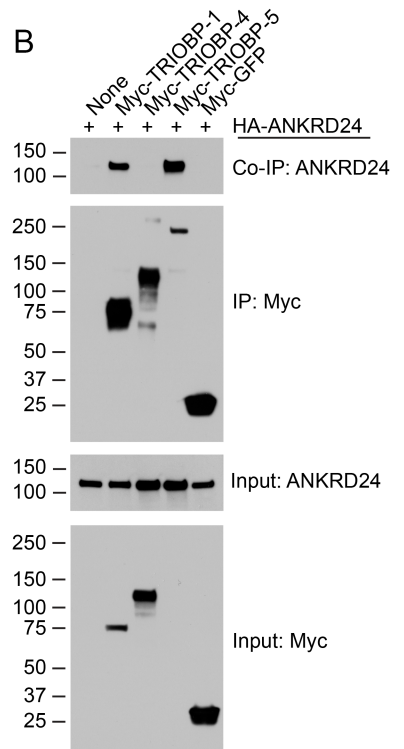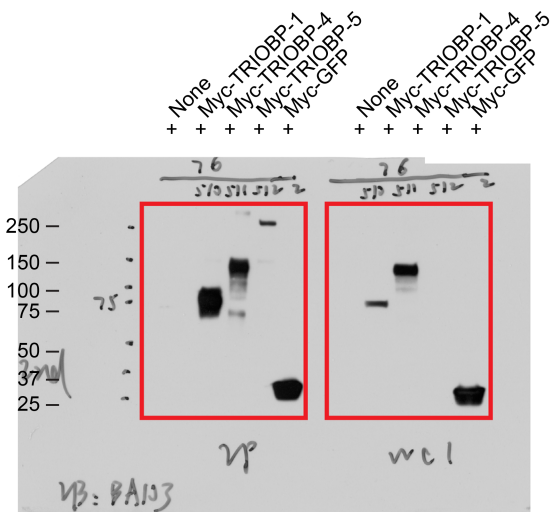

76: HA-Ankrd24  
510: Myc-triobp isoform 1  
511: Myc-triobp isoform 4  
512: Myc-triobp isoform 5  
2: Myc-GFP  
BA36: anti-HA  
BA103: anti-Myc
