# Supplementary material for: ANKRD24 organizes TRIOBP to reinforce stereocilia insertion points
Source: PubMed Central journal article supplement (PMC8859912; doi:10.1083/jcb.202109134), 2022-02-17
Supplement: JCB_202109134_SourceDataF4.pdf [file JCB_202109134_SourceDataF4.pdf]

Fig 4B

+ + + + + + +

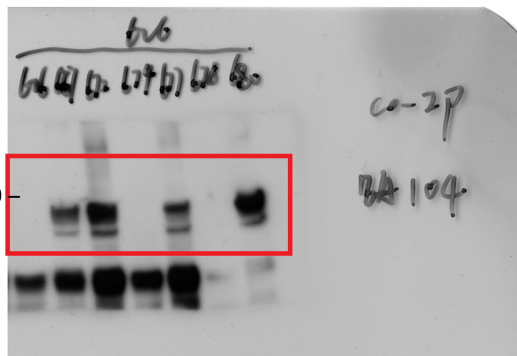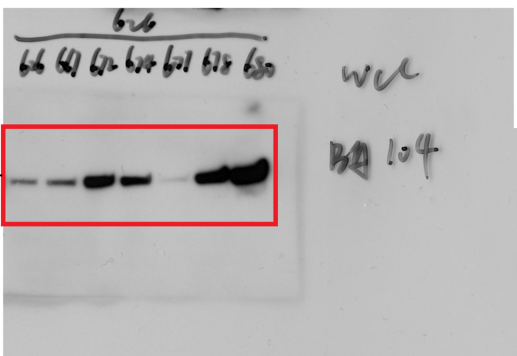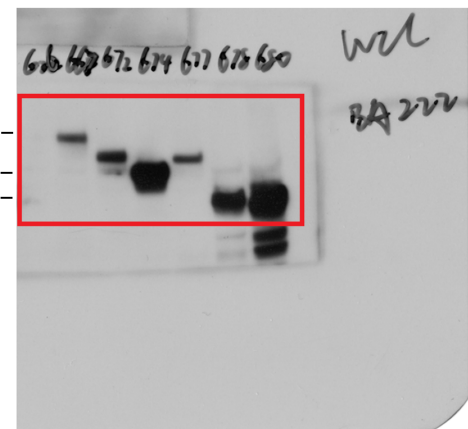

B

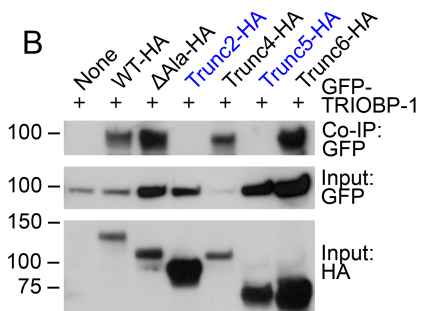

Fig 4C

|            | + | + | + | - | - | + | + | + | - | - |
|------------|---|---|---|---|---|---|---|---|---|---|
| WT-GFP     |   |   |   |   |   |   |   |   |   |   |
| Trunc6-GFP | - | - | - | + | + | - | - | - | + | + |
| Trunc2-HA  | - | + | - | - | + | - | + | - | - | + |
| Trunc6-HA  | - | - | + | - | - | - | - | + | - | - |

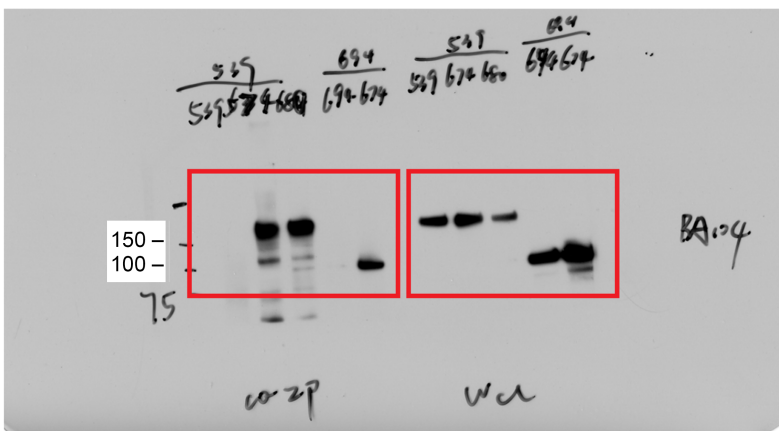

|            | + | + | + | - | - |
|------------|---|---|---|---|---|
| WT-GFP     |   |   |   |   |   |
| Trunc6-GFP | - | - | - | + | + |
| Trunc2-HA  | - | + | - | - | + |
| Trunc6-HA  | - | - | + | - | - |

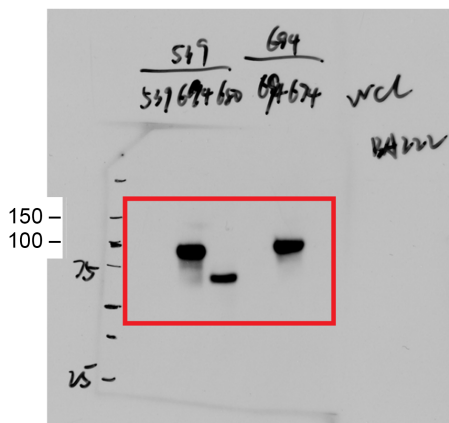

C

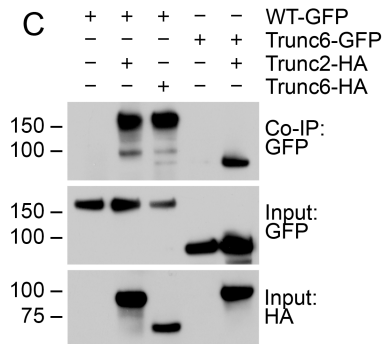

539: ankrd24-GFP  
 674: Ankrd24 Trunc2 (1-691)-HA  
 680: Ankrd24 Trunc6 (489-985)-HA  
 694: Ankrd24 Trunc6 (489-985)-GFP  
 BA104: anti-GFP  
 BA222: anti-HA
